# Supplementary material
Source: PubMed Central journal article supplement (PMC2040474)

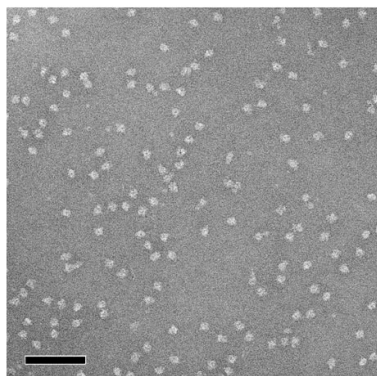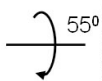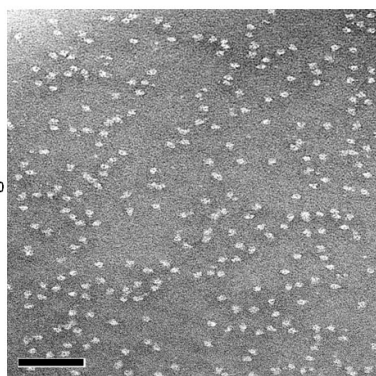

a

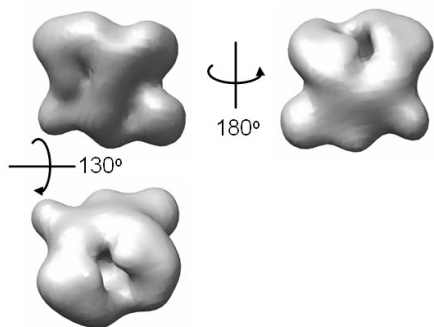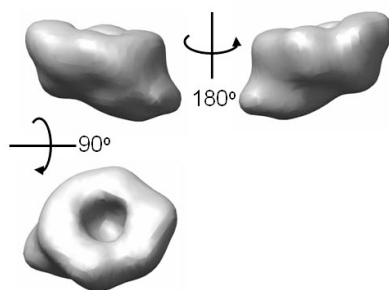

b

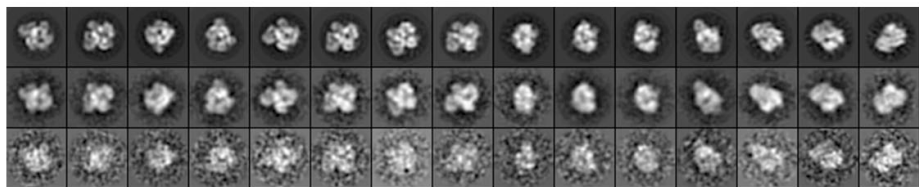

c

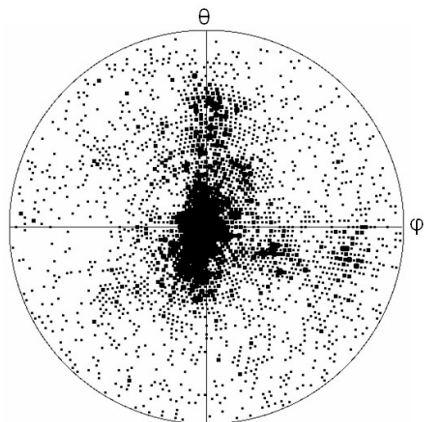

d

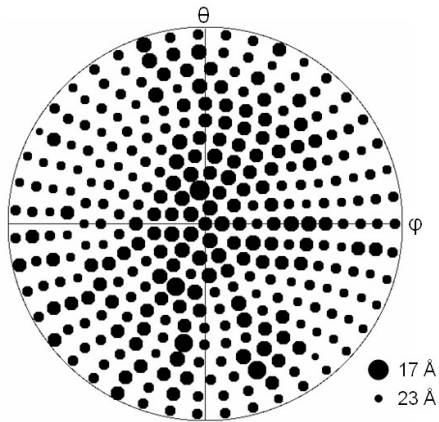

e

Supplement: pnas_0705526104_1.pdf [file pnas_0705526104_1.pdf]

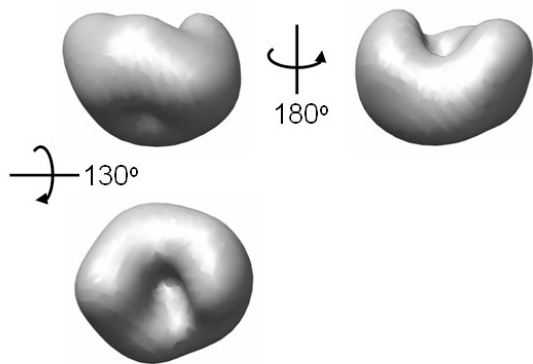

a

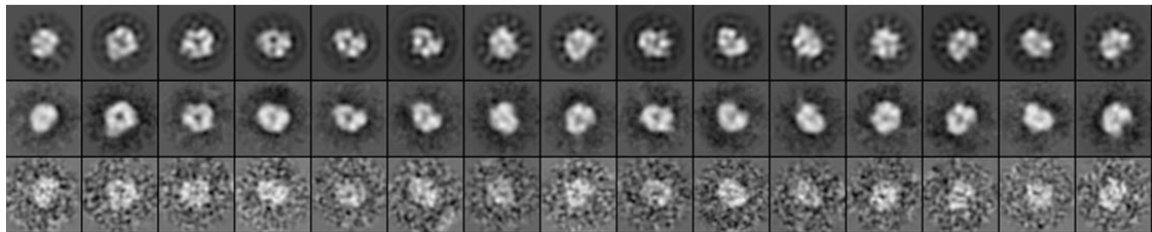

b

Supplement: pnas_0705526104_2.pdf [file pnas_0705526104_2.pdf]

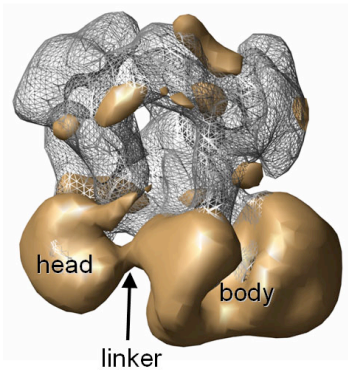

Supplement: pnas_0705526104_3.pdf [file pnas_0705526104_3.pdf]

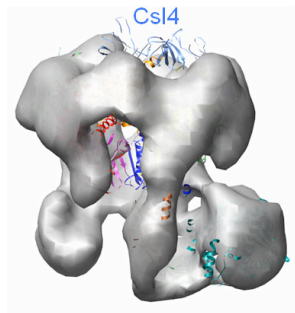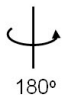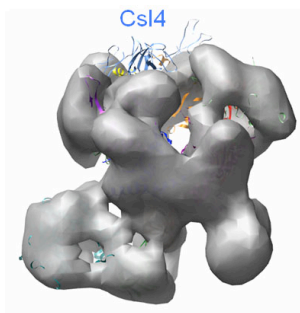

a

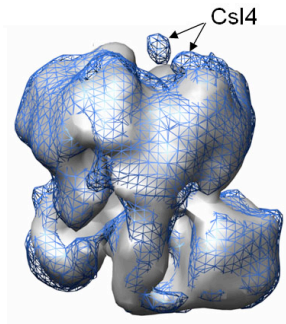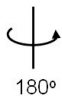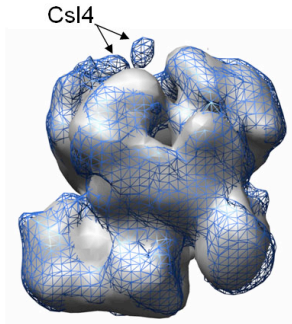

b

Supplement: pnas_0705526104_4.pdf [file pnas_0705526104_4.pdf]

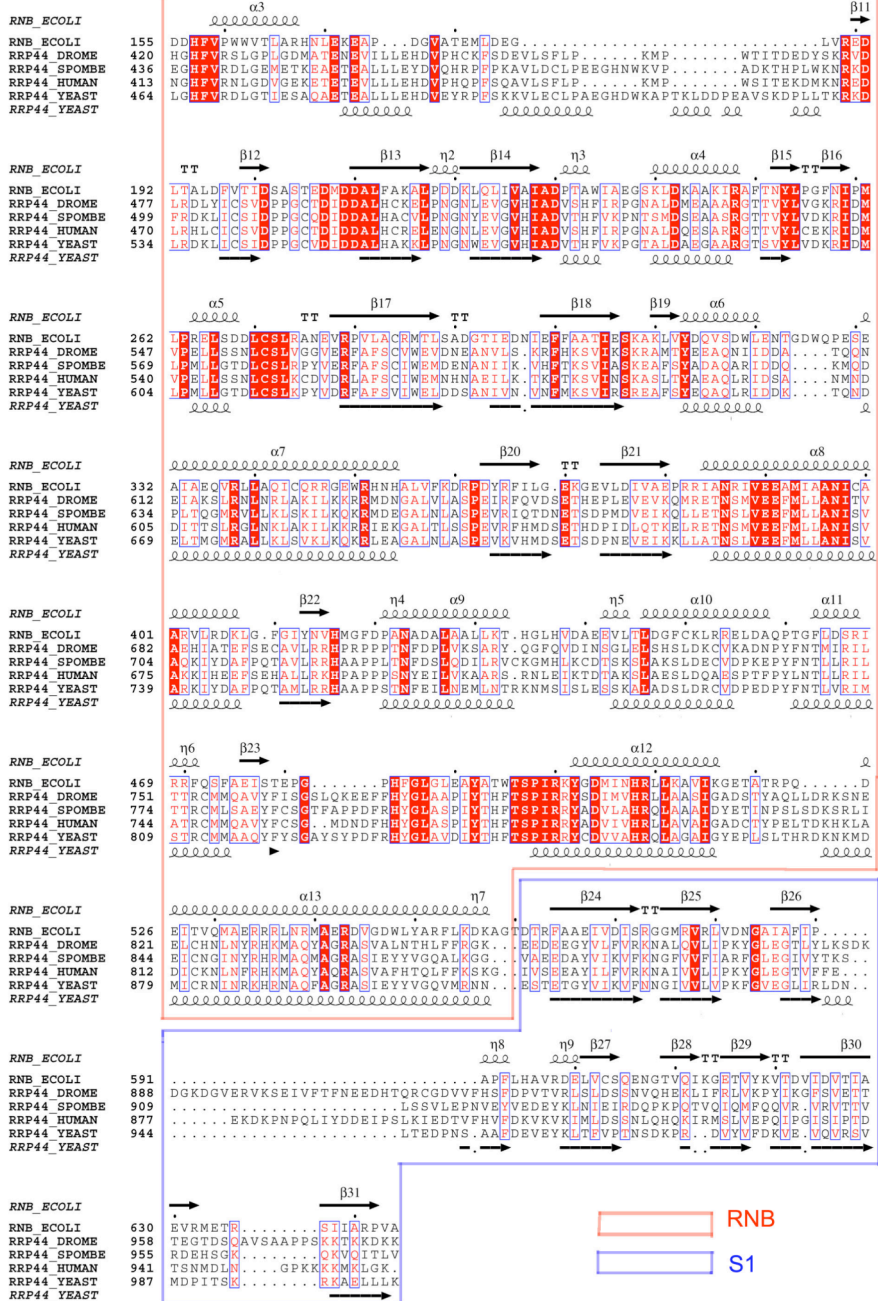

Supplement: pnas_0705526104_5.pdf [file pnas_0705526104_5.pdf]
